# Supplementary material for: Non-Invasive Approach to Investigate the Mineralogy and Production Technology of the Mosaic Tesserae from the Roman Domus of Villa San Pancrazio (Taormina, Italy)
Source: MDPI journal article supplement (doi:10.3390/cryst11111423), 2021-11-21
Supplement: s1 [file s1]

Archive with 9 entries (9 files):
- Figure S1.tif
- Figure S2.tif
- Figure S3.tif
- Figure S4.tif
- Figure S5.tif
- Figure S6.tif
- Supplementary figure captions.pdf
- Table S1.pdf
- Table S2.pdf
