# Supplementary material for: Non-Invasive Approach to Investigate the Mineralogy and Production Technology of the Mosaic Tesserae from the Roman Domus of Villa San Pancrazio (Taormina, Italy)
Source: MDPI journal article supplement (doi:10.3390/cryst11111423), 2021-11-21
Supplement: s1 [file s1 › Supplementary figure captions.pdf]

**Figure S1.** Aerial view of modern Taormina; the white arrow points out the position of the Hotel Villa San Pancrazio (Sicily, Italy).

**Figure S2.** Plan of the Hotel Villa San Pancrazio and its park, showing the position of the Roman houses: in green *Domus* 1; in grey *Domus* 2 and 2a; in yellow *Domus* 3; in purple Roman reservoir.

**Figure S3.** View of *Domus* 1 after the excavations of the past century.

**Figure S4.** *Domus* 2, wall-paintings of the northern corridor of the courtyard.

**Figure S5.** *Domus* 1, wall-paintings of Room 12.

**Figure S6.** Plan of *Domus* 1 showing the sampling location of the analyzed white and black tesserae.
