# Supplementary material for: Non-Invasive Approach to Investigate the Mineralogy and Production Technology of the Mosaic Tesserae from the Roman Domus of Villa San Pancrazio (Taormina, Italy)
Source: MDPI journal article supplement (doi:10.3390/cryst11111423), 2021-11-21
Supplement: s1 [file s1 › Table S1.pdf]

**Table S1.** Mosaic *tesserae* samples from the archaeological area of Villa San Pancrazio (Taormina, Italy).

| Sample ID | <i>Domus</i> | Room | Mosaic     | Colour    |
|-----------|--------------|------|------------|-----------|
| 111W      | 1            | 1    | bichrome   | white     |
| 211W      | 1            | 1    | bichrome   | white     |
| 311W      | 1            | 1    | bichrome   | white     |
| 411W      | 1            | 1    | bichrome   | white     |
| 511W      | 1            | 1    | bichrome   | white     |
| 611B      | 1            | 1    | bichrome   | black     |
| 711B      | 1            | 1    | bichrome   | black     |
| 811B      | 1            | 1    | bichrome   | black     |
| 911B      | 1            | 1    | bichrome   | black     |
| 1011B     | 1            | 1    | bichrome   | black     |
| 119W      | 1            | 9    | monochrome | white     |
| 219W      | 1            | 9    | monochrome | white     |
| 319W      | 1            | 9    | monochrome | white     |
| 419W      | 1            | 9    | monochrome | white     |
| 519W      | 1            | 9    | monochrome | white     |
| 1113W     | 1            | 13   | bichrome   | white     |
| 2113W     | 1            | 13   | bichrome   | white     |
| 3113W     | 1            | 13   | bichrome   | white     |
| 4113W     | 1            | 13   | bichrome   | white     |
| 5113W     | 1            | 13   | bichrome   | white     |
| 6113B     | 1            | 13   | bichrome   | black     |
| 7113B     | 1            | 13   | bichrome   | black     |
| 8113B     | 1            | 13   | bichrome   | black     |
| 9113B     | 1            | 13   | bichrome   | black     |
| 10113B    | 1            | 13   | bichrome   | black     |
| 1117R     | 1            | 17   | polychrome | red       |
| 2117W     | 1            | 17   | polychrome | white     |
| 3117W     | 1            | 17   | polychrome | white     |
| 5117W     | 1            | 17   | polychrome | white     |
| 6117W     | 1            | 17   | polychrome | white     |
| 7117P     | 1            | 17   | polychrome | pink      |
| 8117B     | 1            | 17   | polychrome | black     |
| 9117B     | 1            | 17   | polychrome | black     |
| 10117B    | 1            | 17   | polychrome | black     |
| 11117B    | 1            | 17   | polychrome | black     |
| 12117B    | 1            | 17   | polychrome | black     |
| 14117BV   | 1            | 17   | niche      | blue      |
| 18117BV   | 1            | 17   | niche      | blue      |
| 15117RV   | 1            | 17   | niche      | red       |
| 16117V    | 1            | 17   | niche      | colorless |
| 17117BV   | 1            | 17   | niche      | blue      |
| 1118V     | 1            | 18   | niche      | colorless |
| 2118V     | 1            | 18   | niche      | colorless |

| Sample ID | <i>Domus</i> | Room | Mosaic     | Colour |
|-----------|--------------|------|------------|--------|
| 1128W     | 1            | 28   | monochrome | white  |
| 2128W     | 1            | 28   | monochrome | white  |
| 3128W     | 1            | 28   | monochrome | white  |
| 4128W     | 1            | 28   | monochrome | white  |
| 5128W     | 1            | 28   | monochrome | white  |
| 11AEW     | 1            | AmbE | bichrome   | white  |
| 21AEW     | 1            | AmbE | bichrome   | white  |
| 31AEW     | 1            | AmbE | bichrome   | white  |
| 41AEW     | 1            | AmbE | bichrome   | white  |
| 51AEW     | 1            | AmbE | bichrome   | white  |
| 61AEB     | 1            | AmbE | bichrome   | black  |
| 71AEB     | 1            | AmbE | bichrome   | black  |
| 81AEB     | 1            | AmbE | bichrome   | black  |
| 91AEB     | 1            | AmbE | bichrome   | black  |
| 101AEB    | 1            | AmbE | bichrome   | black  |
| 1222W     | 2a           | 22   | polychrome | white  |
| 2222W     | 2a           | 22   | polychrome | white  |
| 3222W     | 2a           | 22   | polychrome | white  |
| 4222B     | 2a           | 22   | polychrome | black  |
| 5222B     | 2a           | 22   | polychrome | black  |
| 6222B     | 2a           | 22   | polychrome | black  |
| 7222B     | 2a           | 22   | polychrome | black  |
| 8222B     | 2a           | 22   | polychrome | black  |
| 9222O     | 2a           | 22   | polychrome | orange |
| 10222Y    | 2a           | 22   | polychrome | yellow |
| 11222P    | 2a           | 22   | polychrome | pink   |
| 1228W     | 2a           | 28   | bichrome   | white  |
| 2228W     | 2a           | 28   | bichrome   | white  |
| 3228W     | 2a           | 28   | bichrome   | white  |
| 4228W     | 2a           | 28   | bichrome   | white  |
| 5228W     | 2a           | 28   | bichrome   | white  |
| 6228B     | 2a           | 28   | bichrome   | black  |
| 7228B     | 2a           | 28   | bichrome   | black  |
| 8228B     | 2a           | 28   | bichrome   | black  |
| 9228B     | 2a           | 28   | bichrome   | black  |
| 10228B    | 2a           | 28   | bichrome   | black  |
