# Supplementary material for: Non-Invasive Approach to Investigate the Mineralogy and Production Technology of the Mosaic Tesserae from the Roman Domus of Villa San Pancrazio (Taormina, Italy)
Source: MDPI journal article supplement (doi:10.3390/cryst11111423), 2021-11-21
Supplement: s1 [file s1 › Table S2.pdf]

**Table S2.** EDXRF elemental data (wt.%) of white and black stone *tesserae* samples.

| Sample ID | Si    | Ti    | Al    | Fe    | Mn    | Mg     | Ca     | Na   | K     | P     | Cr   | Ni    | Rb   | Sr    | Zr   | Ba   | S     | V     | Cu   | Zn    |
|-----------|-------|-------|-------|-------|-------|--------|--------|------|-------|-------|------|-------|------|-------|------|------|-------|-------|------|-------|
| 111W      | N.D.  | N.D.  | 0.398 | 0.021 | 0.022 | N.D.   | 99.353 | N.D. | N.D.  | 0.049 | N.D. | 0.013 | N.D. | 0.125 | N.D. | N.D. | N.D.  | N.D.  | N.D. | 0.020 |
| 211W      | N.D.  | N.D.  | 0.106 | 0.020 | 0.014 | N.D.   | 99.577 | N.D. | N.D.  | 0.153 | N.D. | N.D.  | N.D. | 0.119 | N.D. | N.D. | N.D.  | N.D.  | N.D. | 0.011 |
| 311W      | 0.644 | 0.042 | N.D.  | 0.470 | 0.024 | N.D.   | 98.543 | N.D. | N.D.  | N.D.  | N.D. | N.D.  | N.D. | 0.277 | N.D. | N.D. | N.D.  | N.D.  | N.D. | N.D.  |
| 411W      | 0.227 | N.D.  | N.D.  | 0.067 | 0.014 | N.D.   | 99.531 | N.D. | N.D.  | N.D.  | N.D. | N.D.  | N.D. | 0.147 | N.D. | N.D. | N.D.  | N.D.  | N.D. | 0.014 |
| 511W      | N.D.  | N.D.  | 0.059 | 0.029 | 0.022 | N.D.   | 99.814 | N.D. | N.D.  | N.D.  | N.D. | 0.008 | N.D. | 0.172 | N.D. | N.D. | N.D.  | N.D.  | N.D. | N.D.  |
| 119W      | N.D.  | N.D.  | N.D.  | N.D.  | N.D.  | N.D.   | 99.854 | N.D. | N.D.  | 0.045 | N.D. | N.D.  | N.D. | 0.062 | N.D. | N.D. | 0.039 | N.D.  | N.D. | N.D.  |
| 219W      | N.D.  | N.D.  | 0.169 | 0.024 | N.D.  | N.D.   | 99.744 | N.D. | N.D.  | N.D.  | N.D. | N.D.  | N.D. | 0.063 | N.D. | N.D. | N.D.  | N.D.  | N.D. | N.D.  |
| 319W      | N.D.  | N.D.  | N.D.  | 0.036 | 0.017 | N.D.   | 99.735 | N.D. | N.D.  | 0.118 | N.D. | 0.010 | N.D. | 0.084 | N.D. | N.D. | N.D.  | N.D.  | N.D. | N.D.  |
| 419W      | 0.265 | N.D.  | N.D.  | 0.320 | N.D.  | N.D.   | 98.972 | N.D. | N.D.  | 0.334 | N.D. | 0.017 | N.D. | 0.076 | N.D. | N.D. | N.D.  | N.D.  | N.D. | 0.015 |
| 519W      | N.D.  | N.D.  | N.D.  | N.D.  | 0.028 | N.D.   | 99.748 | N.D. | N.D.  | 0.130 | N.D. | 0.010 | N.D. | 0.064 | N.D. | N.D. | N.D.  | N.D.  | N.D. | 0.020 |
| 1113W     | N.D.  | N.D.  | N.D.  | N.D.  | 0.021 | N.D.   | 99.643 | N.D. | N.D.  | 0.172 | N.D. | N.D.  | N.D. | 0.151 | N.D. | N.D. | N.D.  | N.D.  | N.D. | 0.013 |
| 2113W     | 0.591 | N.D.  | 0.042 | 0.052 | N.D.  | N.D.   | 99.169 | N.D. | N.D.  | N.D.  | N.D. | N.D.  | N.D. | 0.146 | N.D. | N.D. | N.D.  | N.D.  | N.D. | N.D.  |
| 3113W     | N.D.  | N.D.  | N.D.  | 0.070 | N.D.  | N.D.   | 99.723 | N.D. | N.D.  | 0.057 | N.D. | 0.007 | N.D. | 0.143 | N.D. | N.D. | N.D.  | N.D.  | N.D. | N.D.  |
| 4113W     | N.D.  | N.D.  | N.D.  | N.D.  | 0.025 | N.D.   | 99.707 | N.D. | N.D.  | 0.113 | N.D. | 0.006 | N.D. | 0.137 | N.D. | N.D. | N.D.  | N.D.  | N.D. | 0.011 |
| 5113W     | N.D.  | N.D.  | N.D.  | 0.025 | 0.028 | N.D.   | 99.674 | N.D. | N.D.  | 0.113 | N.D. | 0.008 | N.D. | 0.139 | N.D. | N.D. | N.D.  | N.D.  | N.D. | 0.013 |
| 2117W     | 0.467 | 0.028 | 0.119 | 0.257 | 0.097 | 0.282  | 97.955 | N.D. | 0.039 | 0.086 | N.D. | N.D.  | N.D. | 0.648 | N.D. | N.D. | 0.021 | N.D.  | N.D. | N.D.  |
| 3117W     | 0.854 | 0.032 | N.D.  | 0.420 | 0.110 | N.D.   | 97.820 | N.D. | N.D.  | 0.070 | N.D. | 0.006 | N.D. | 0.669 | N.D. | N.D. | 0.004 | N.D.  | N.D. | 0.015 |
| 5117W     | 0.726 | 0.041 | N.D.  | 0.452 | 0.111 | N.D.   | 98.105 | N.D. | N.D.  | N.D.  | N.D. | 0.013 | N.D. | 0.553 | N.D. | N.D. | N.D.  | N.D.  | N.D. | N.D.  |
| 6117W     | 0.526 | N.D.  | 0.097 | 0.341 | 0.097 | N.D.   | 98.238 | N.D. | N.D.  | N.D.  | N.D. | N.D.  | N.D. | 0.702 | N.D. | N.D. | N.D.  | N.D.  | N.D. | N.D.  |
| 1128W     | N.D.  | 0.011 | 0.084 | N.D.  | N.D.  | N.D.   | 99.688 | N.D. | N.D.  | 0.118 | N.D. | N.D.  | N.D. | 0.091 | N.D. | N.D. | 0.008 | N.D.  | N.D. | N.D.  |
| 2128W     | N.D.  | N.D.  | N.D.  | N.D.  | 0.011 | N.D.   | 99.724 | N.D. | N.D.  | 0.048 | N.D. | 0.013 | N.D. | 0.204 | N.D. | N.D. | N.D.  | N.D.  | N.D. | N.D.  |
| 3128W     | N.D.  | N.D.  | N.D.  | N.D.  | 0.015 | N.D.   | 99.432 | N.D. | N.D.  | 0.334 | N.D. | 0.010 | N.D. | 0.189 | N.D. | N.D. | N.D.  | N.D.  | N.D. | 0.020 |
| 4128W     | N.D.  | N.D.  | N.D.  | 0.013 | N.D.  | N.D.   | 99.710 | N.D. | N.D.  | 0.080 | N.D. | 0.006 | N.D. | 0.169 | N.D. | N.D. | 0.022 | N.D.  | N.D. | N.D.  |
| 5128W     | N.D.  | 0.101 | N.D.  | 1.343 | 0.077 | N.D.   | 98.258 | N.D. | N.D.  | N.D.  | N.D. | 0.008 | N.D. | 0.189 | N.D. | N.D. | N.D.  | N.D.  | N.D. | 0.024 |
| 11AEW     | N.D.  | N.D.  | N.D.  | 0.135 | N.D.  | 20.026 | 79.587 | N.D. | N.D.  | N.D.  | N.D. | 0.028 | N.D. | 0.138 | N.D. | N.D. | N.D.  | 0.087 | N.D. | N.D.  |
| 21AEW     | N.D.  | N.D.  | N.D.  | 0.221 | N.D.  | 17.131 | 82.197 | N.D. | N.D.  | 0.059 | N.D. | N.D.  | N.D. | 0.155 | N.D. | N.D. | 0.187 | 0.027 | N.D. | 0.023 |
| 31AEW     | N.D.  | N.D.  | N.D.  | 0.276 | 0.026 | 18.084 | 81.425 | N.D. | N.D.  | N.D.  | N.D. | 0.014 | N.D. | 0.155 | N.D. | N.D. | N.D.  | N.D.  | N.D. | 0.020 |
| 41AEW     | N.D.  | N.D.  | N.D.  | 0.266 | 0.033 | 17.300 | 82.031 | N.D. | N.D.  | 0.158 | N.D. | 0.022 | N.D. | 0.147 | N.D. | N.D. | 0.043 | N.D.  | N.D. | N.D.  |
| 51AEW     | N.D.  | N.D.  | N.D.  | 0.398 | N.D.  | 17.145 | 82.272 | N.D. | N.D.  | N.D.  | N.D. | 0.022 | N.D. | 0.163 | N.D. | N.D. | N.D.  | N.D.  | N.D. | N.D.  |

| Sample ID | Si     | Ti    | Al     | Fe     | Mn    | Mg     | Ca     | Na    | K      | P     | Cr    | Ni    | Rb    | Sr    | Zr    | Ba    | S     | V     | Cu    | Zn    |
|-----------|--------|-------|--------|--------|-------|--------|--------|-------|--------|-------|-------|-------|-------|-------|-------|-------|-------|-------|-------|-------|
| 1222W     | N.D.   | 0.003 | 0.094  | 0.509  | 0.025 | 18.949 | 80.093 | N.D.  | N.D.   | 0.064 | N.D.  | 0.058 | N.D.  | 0.135 | N.D.  | N.D.  | N.D.  | 0.071 | N.D.  | N.D.  |
| 2222W     | 0.594  | 0.067 | N.D.   | 0.147  | 0.014 | N.D.   | 98.555 | N.D.  | N.D.   | 0.190 | N.D.  | 0.014 | N.D.  | 0.390 | N.D.  | N.D.  | N.D.  | N.D.  | N.D.  | 0.028 |
| 3222W     | N.D.   | N.D.  | N.D.   | N.D.   | 0.028 | N.D.   | 99.650 | N.D.  | N.D.   | N.D.  | N.D.  | 0.011 | N.D.  | 0.294 | N.D.  | N.D.  | N.D.  | N.D.  | N.D.  | 0.017 |
| 1228W     | N.D.   | N.D.  | N.D.   | N.D.   | 0.020 | N.D.   | 99.310 | N.D.  | N.D.   | 0.100 | N.D.  | N.D.  | N.D.  | 0.560 | N.D.  | N.D.  | 0.010 | N.D.  | N.D.  | N.D.  |
| 2228W     | 1.674  | 0.090 | 0.350  | 0.542  | 0.027 | N.D.   | 96.850 | N.D.  | N.D.   | N.D.  | N.D.  | 0.006 | N.D.  | 0.444 | N.D.  | N.D.  | N.D.  | N.D.  | N.D.  | 0.017 |
| 3228W     | N.D.   | N.D.  | N.D.   | N.D.   | 0.024 | N.D.   | 99.421 | N.D.  | N.D.   | 0.084 | N.D.  | N.D.  | N.D.  | 0.471 | N.D.  | N.D.  | N.D.  | N.D.  | N.D.  | N.D.  |
| 4228W     | N.D.   | N.D.  | 0.214  | 0.021  | N.D.  | N.D.   | 99.300 | N.D.  | N.D.   | N.D.  | N.D.  | N.D.  | N.D.  | 0.465 | N.D.  | N.D.  | N.D.  | N.D.  | N.D.  | N.D.  |
| 5228W     | N.D.   | N.D.  | 0.214  | 0.021  | N.D.  | N.D.   | 99.300 | N.D.  | N.D.   | N.D.  | N.D.  | N.D.  | N.D.  | 0.465 | N.D.  | N.D.  | N.D.  | N.D.  | N.D.  | N.D.  |
| 611B      | 35.487 | 1.437 | 11.379 | 12.053 | 0.304 | 4.662  | 19.112 | 3.415 | 10.515 | 1.023 | 0.029 | 0.002 | 0.074 | 0.404 | 0.052 | N.D.  | N.D.  | 0.024 | 0.014 | 0.017 |
| 711B      | 37.855 | 0.676 | 17.177 | 7.962  | 0.161 | 1.561  | 11.221 | 3.096 | 19.338 | 0.194 | 0.007 | 0.002 | 0.047 | 0.239 | 0.052 | 0.369 | N.D.  | N.D.  | 0.023 | 0.021 |
| 811B      | 36.406 | 0.503 | 17.461 | 4.009  | 0.070 | 1.577  | 11.638 | 2.324 | 25.358 | 0.161 | 0.022 | 0.002 | 0.113 | 0.133 | 0.022 | 0.183 | N.D.  | N.D.  | 0.009 | 0.009 |
| 911B      | 34.335 | 0.739 | 16.173 | 8.850  | 0.159 | 0.756  | 20.533 | 1.445 | 16.276 | 0.126 | 0.002 | 0.002 | 0.027 | 0.222 | 0.039 | 0.265 | 0.009 | 0.017 | 0.010 | 0.015 |
| 1011B     | 35.964 | 1.559 | 14.595 | 11.179 | 0.193 | 3.027  | 11.678 | 2.117 | 18.450 | 0.714 | 0.009 | N.D.  | 0.052 | 0.310 | 0.057 | N.D.  | N.D.  | 0.072 | 0.007 | 0.017 |
| 6113B     | 34.722 | 0.894 | 15.594 | 12.564 | 0.235 | 2.471  | 16.251 | 3.272 | 11.754 | 0.981 | N.D.  | N.D.  | 0.038 | 0.577 | 0.069 | 0.480 | 0.014 | 0.045 | 0.022 | 0.017 |
| 7113B     | 32.810 | 1.474 | 14.302 | 15.592 | 0.312 | 3.713  | 17.040 | 5.024 | 8.868  | 0.320 | N.D.  | N.D.  | 0.026 | 0.360 | 0.074 | N.D.  | N.D.  | 0.048 | 0.015 | 0.022 |
| 8113B     | 30.762 | 1.013 | 13.219 | 12.287 | 0.254 | 2.014  | 23.584 | 3.474 | 12.240 | 0.405 | 0.012 | 0.002 | 0.039 | 0.465 | 0.066 | 0.129 | N.D.  | N.D.  | 0.018 | 0.018 |
| 9113B     | 35.643 | 0.722 | 15.638 | 9.913  | 0.194 | 2.662  | 13.900 | 3.644 | 16.350 | 0.406 | N.D.  | N.D.  | 0.060 | 0.306 | 0.076 | 0.425 | N.D.  | 0.015 | 0.029 | 0.017 |
| 10113B    | 35.697 | 1.025 | 12.719 | 13.208 | 0.309 | 4.322  | 20.122 | 3.472 | 8.067  | 0.365 | 0.022 | 0.003 | 0.017 | 0.406 | 0.078 | 0.085 | N.D.  | 0.038 | 0.026 | 0.021 |
| 8117B     | 9.154  | 0.066 | 0.978  | 1.784  | 0.102 | 0.640  | 86.495 | N.D.  | 0.352  | 0.034 | 0.006 | N.D.  | N.D.  | 0.245 | N.D.  | N.D.  | 0.128 | N.D.  | N.D.  | 0.016 |
| 9117B     | 11.629 | 0.128 | 2.441  | 2.685  | 0.072 | 1.123  | 79.998 | N.D.  | 0.959  | 0.191 | N.D.  | N.D.  | N.D.  | 0.254 | 0.005 | N.D.  | 0.467 | 0.033 | N.D.  | 0.015 |
| 10117B    | 16.429 | 0.125 | 5.140  | 1.618  | 0.060 | 0.621  | 73.985 | N.D.  | 1.757  | N.D.  | 0.006 | N.D.  | 0.005 | 0.196 | N.D.  | N.D.  | 0.045 | N.D.  | N.D.  | 0.014 |
| 11117B    | 16.947 | 0.221 | 1.593  | 1.582  | 0.083 | 0.882  | 77.788 | N.D.  | 0.470  | 0.035 | 0.011 | N.D.  | N.D.  | 0.214 | N.D.  | N.D.  | 0.161 | N.D.  | N.D.  | 0.012 |
| 12117B    | 10.118 | 0.086 | 0.649  | 1.438  | 0.040 | 0.646  | 86.488 | N.D.  | 0.184  | N.D.  | 0.006 | N.D.  | 0.001 | 0.111 | N.D.  | N.D.  | 0.228 | N.D.  | 0.004 | N.D.  |
| 61AEB     | 15.180 | 0.257 | 3.856  | 3.460  | 0.072 | 0.901  | 74.531 | N.D.  | 1.358  | N.D.  | 0.008 | N.D.  | 0.003 | 0.231 | N.D.  | 0.005 | 0.123 | N.D.  | N.D.  | 0.015 |
| 71AEB     | 18.401 | 0.169 | 2.839  | 2.158  | 0.053 | 0.934  | 74.128 | N.D.  | 1.002  | N.D.  | 0.019 | N.D.  | N.D.  | 0.174 | N.D.  | N.D.  | 0.112 | N.D.  | N.D.  | 0.011 |
| 81AEB     | 11.769 | 0.160 | 2.078  | 1.817  | 0.069 | 0.853  | 81.768 | N.D.  | 1.036  | 0.037 | 0.004 | N.D.  | N.D.  | 0.234 | N.D.  | N.D.  | 0.159 | N.D.  | N.D.  | 0.015 |
| 91AEB     | 14.433 | 0.092 | 1.003  | 2.260  | 0.086 | 0.882  | 80.450 | 0.064 | 0.344  | N.D.  | 0.009 | N.D.  | N.D.  | 0.198 | N.D.  | N.D.  | 0.164 | N.D.  | N.D.  | 0.015 |
| 101AEB    | 9.885  | 0.087 | 1.158  | 1.637  | 0.065 | 0.793  | 85.464 | N.D.  | 0.416  | N.D.  | 0.015 | N.D.  | N.D.  | 0.283 | N.D.  | N.D.  | 0.182 | 0.004 | N.D.  | 0.010 |
| 4222B     | 14.557 | 0.203 | 1.243  | 1.222  | 0.045 | 0.803  | 81.198 | N.D.  | 0.431  | N.D.  | 0.009 | N.D.  | 0.002 | 0.146 | N.D.  | N.D.  | 0.109 | N.D.  | N.D.  | 0.032 |
| 5222B     | 16.033 | 0.092 | 1.136  | 1.442  | 0.085 | 1.050  | 79.444 | 0.043 | 0.345  | 0.011 | 0.003 | N.D.  | N.D.  | 0.238 | N.D.  | N.D.  | 0.064 | N.D.  | N.D.  | 0.014 |
| 6222B     | 15.803 | 0.274 | 0.803  | 1.228  | 0.066 | 0.905  | 80.420 | N.D.  | 0.183  | N.D.  | 0.006 | N.D.  | N.D.  | 0.225 | N.D.  | N.D.  | 0.075 | N.D.  | N.D.  | 0.012 |

| Sample ID | Si     | Ti    | Al     | Fe     | Mn    | Mg    | Ca     | Na    | K      | P     | Cr    | Ni    | Rb    | Sr    | Zr    | Ba    | S     | V     | Cu    | Zn    |
|-----------|--------|-------|--------|--------|-------|-------|--------|-------|--------|-------|-------|-------|-------|-------|-------|-------|-------|-------|-------|-------|
| 7222B     | 14.569 | 0.202 | 2.447  | 1.864  | 0.078 | 1.220 | 78.287 | N.D.  | 0.872  | 0.015 | 0.014 | N.D.  | 0.003 | 0.282 | N.D.  | N.D.  | 0.145 | 0.003 | N.D.  | N.D.  |
| 8222B     | 13.625 | 0.174 | 2.099  | 1.800  | 0.061 | 0.688 | 80.509 | N.D.  | 0.688  | 0.006 | 0.005 | N.D.  | N.D.  | 0.209 | N.D.  | N.D.  | 0.118 | 0.008 | N.D.  | 0.011 |
| 6228B     | 31.502 | 0.847 | 15.344 | 10.379 | 0.191 | 1.911 | 19.468 | 2.392 | 16.252 | 0.582 | 0.017 | N.D.  | 0.059 | 0.449 | 0.084 | 0.479 | N.D.  | N.D.  | 0.025 | 0.017 |
| 7228B     | 47.765 | 1.168 | 18.611 | 8.280  | 0.077 | 1.850 | 13.731 | 0.399 | 7.804  | 0.068 | 0.046 | 0.009 | 0.031 | 0.061 | 0.037 | N.D.  | N.D.  | 0.028 | 0.013 | 0.022 |
| 8228B     | 34.825 | 1.079 | 13.663 | 11.698 | 0.272 | 3.861 | 17.322 | 3.734 | 12.270 | 0.080 | N.D.  | N.D.  | 0.046 | 0.377 | 0.086 | 0.582 | N.D.  | 0.055 | 0.022 | 0.027 |
| 9228B     | 39.583 | 0.445 | 18.726 | 5.286  | 0.131 | 0.834 | 5.574  | 4.850 | 23.033 | 0.691 | 0.005 | 0.003 | 0.063 | 0.136 | 0.030 | 0.576 | N.D.  | N.D.  | 0.023 | 0.010 |
| 10228B    | 36.553 | 0.630 | 15.644 | 8.244  | 0.192 | 6.212 | 15.322 | 3.326 | 12.311 | 0.765 | N.D.  | 0.007 | 0.044 | 0.374 | 0.037 | 0.292 | N.D.  | 0.010 | 0.024 | 0.014 |

N.D.: Non detected
