# Supplementary figures and images for: Non-Invasive Approach to Investigate the Mineralogy and Production Technology of the Mosaic Tesserae from the Roman Domus of Villa San Pancrazio (Taormina, Italy)
Source: MDPI journal article supplement (doi:10.3390/cryst11111423), 2021-11-21

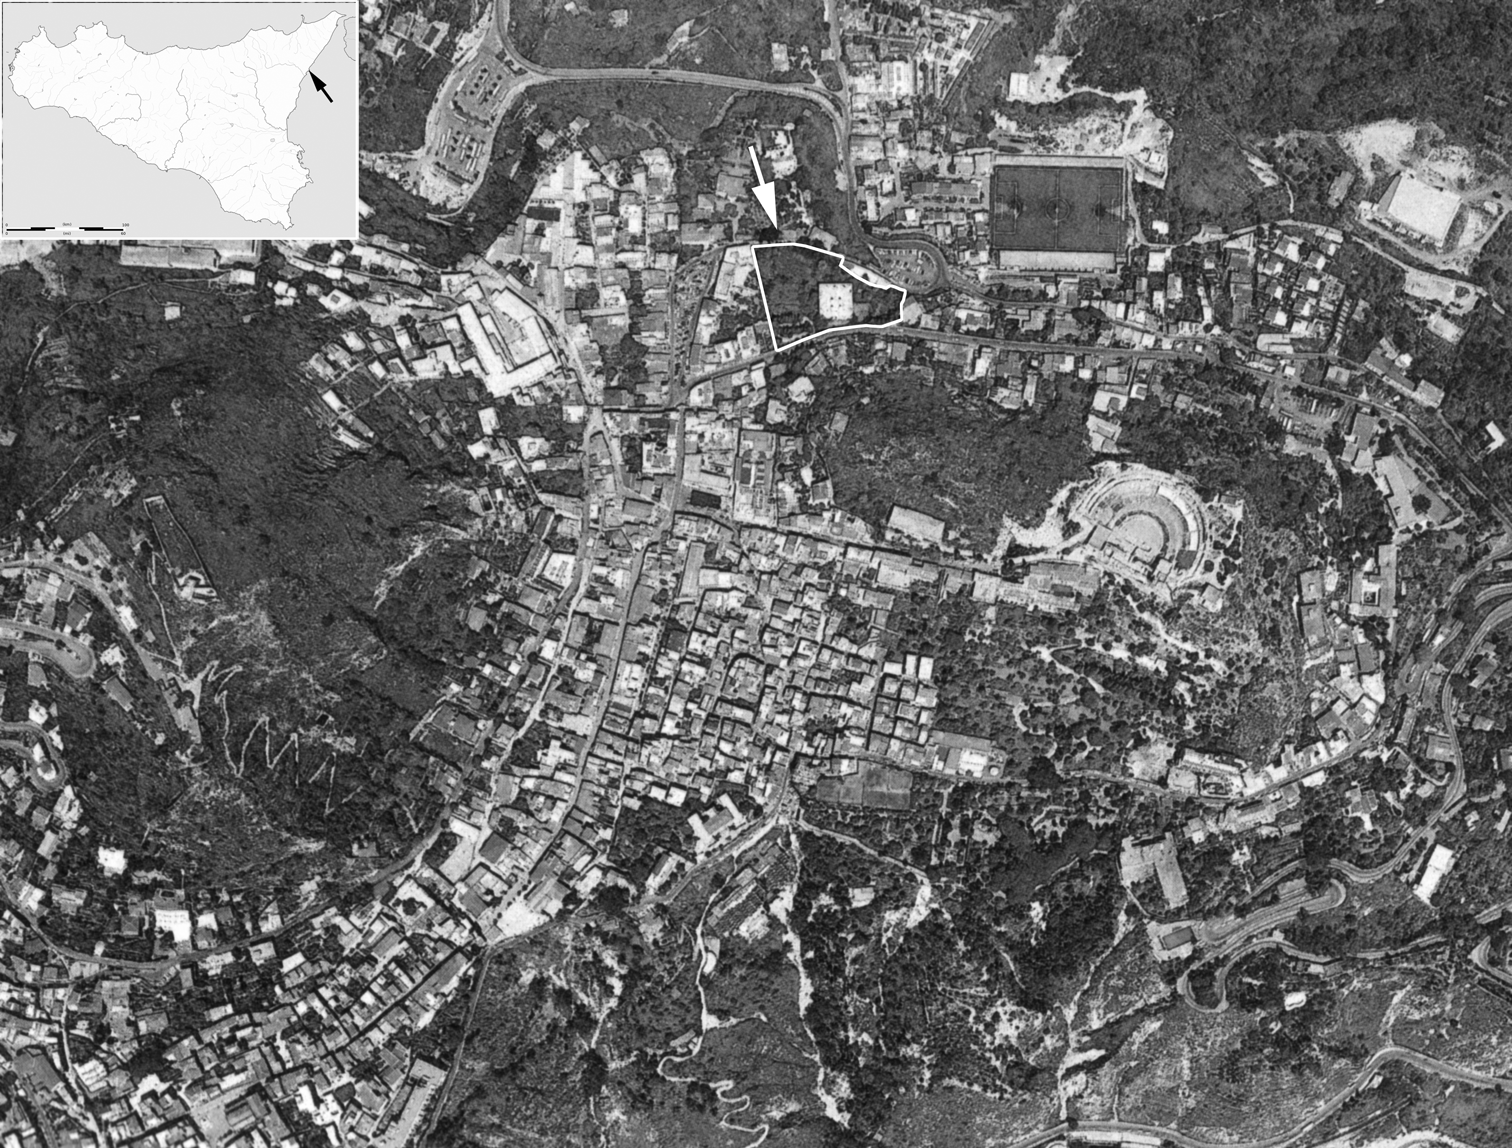

Supplement: s1 [file s1 › Figure S1.tif]

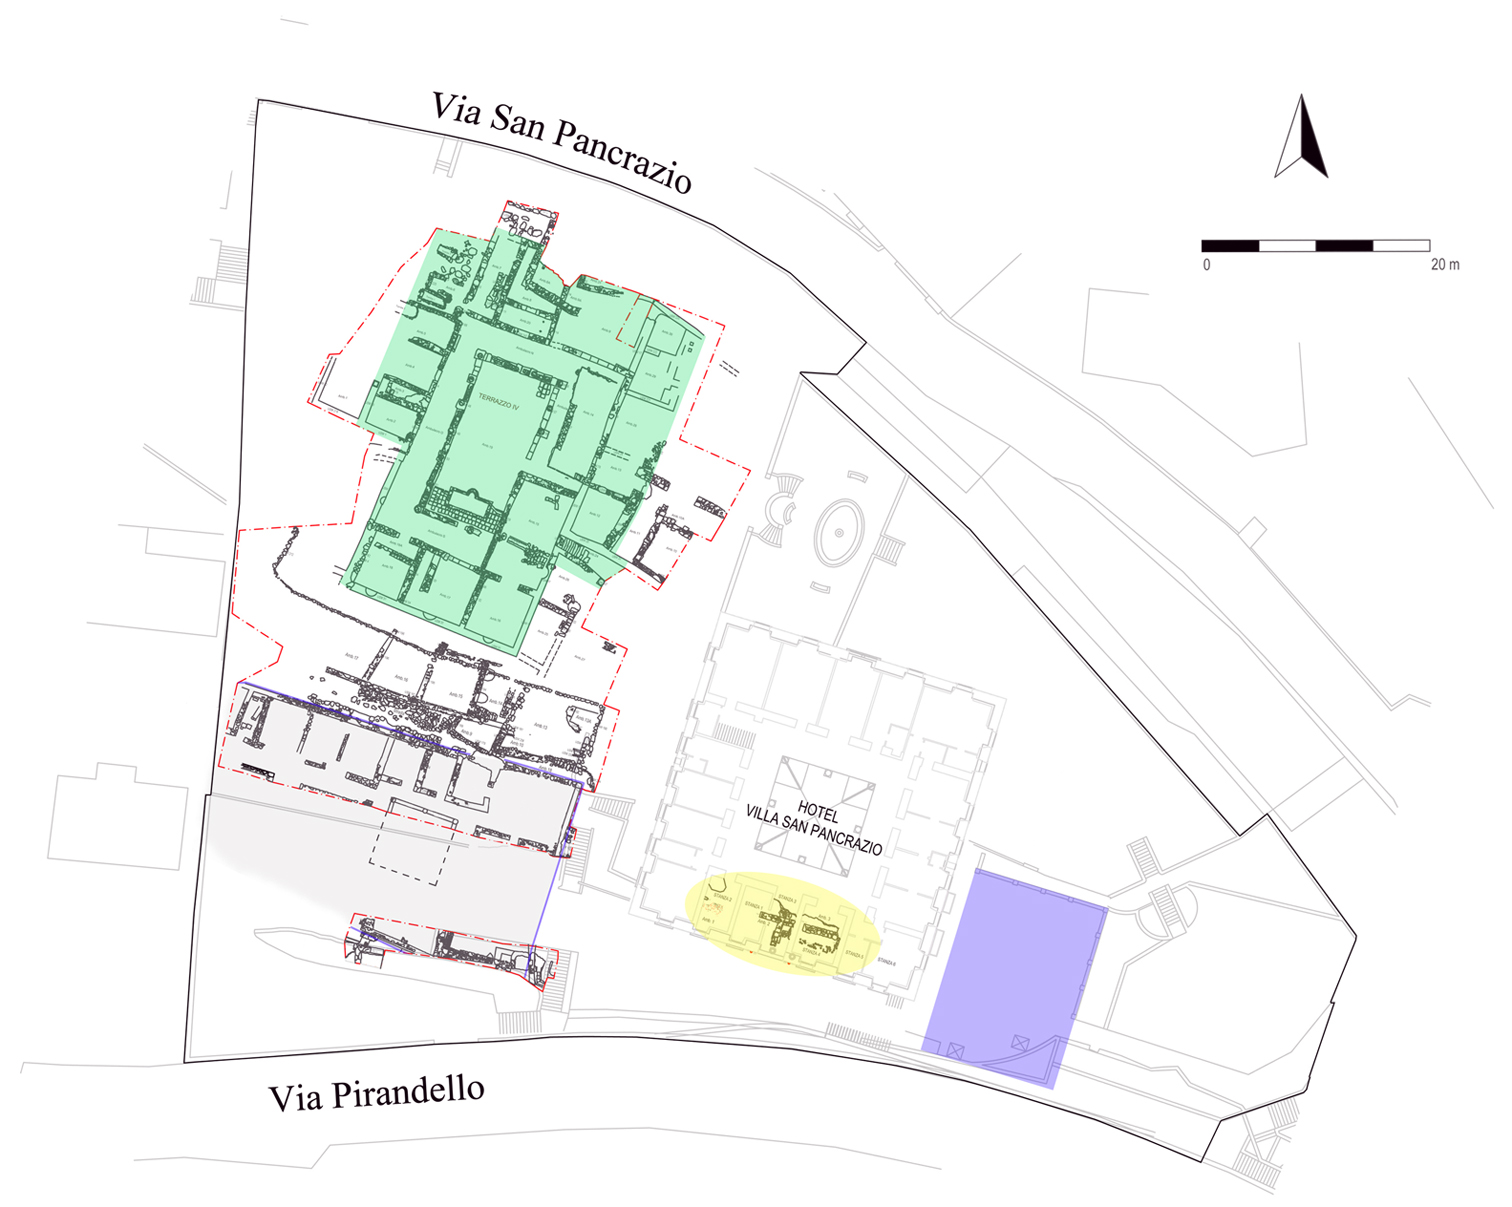

Supplement: s1 [file s1 › Figure S2.tif]

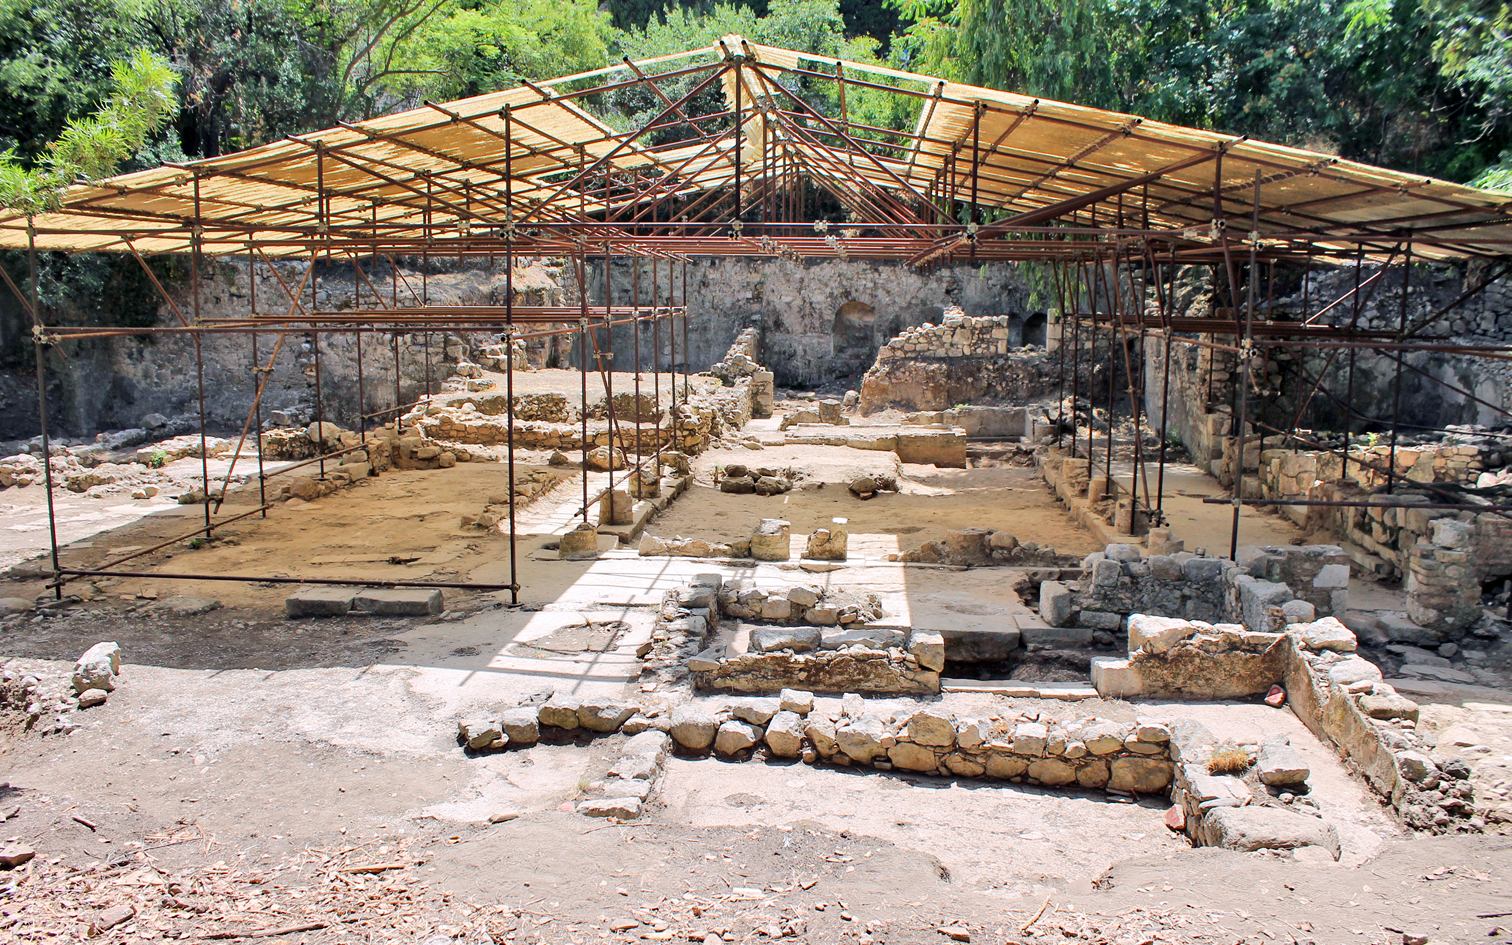

Supplement: s1 [file s1 › Figure S3.tif]

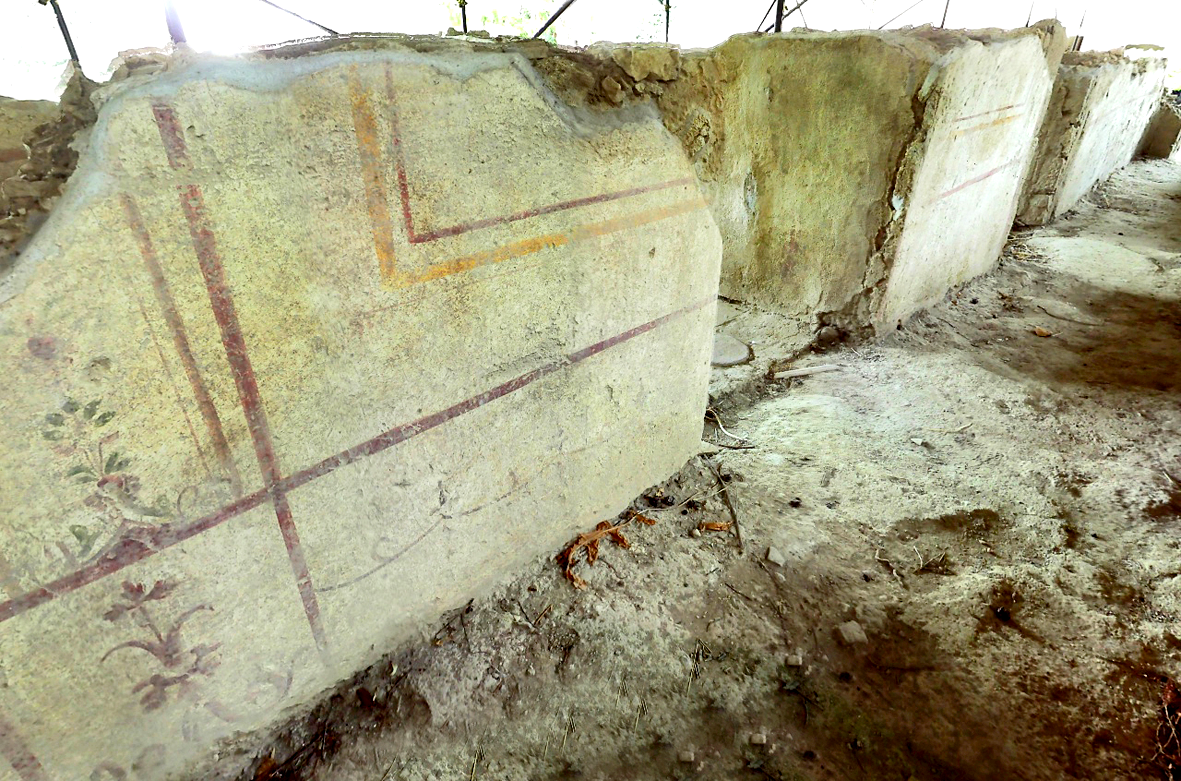

Supplement: s1 [file s1 › Figure S4.tif]

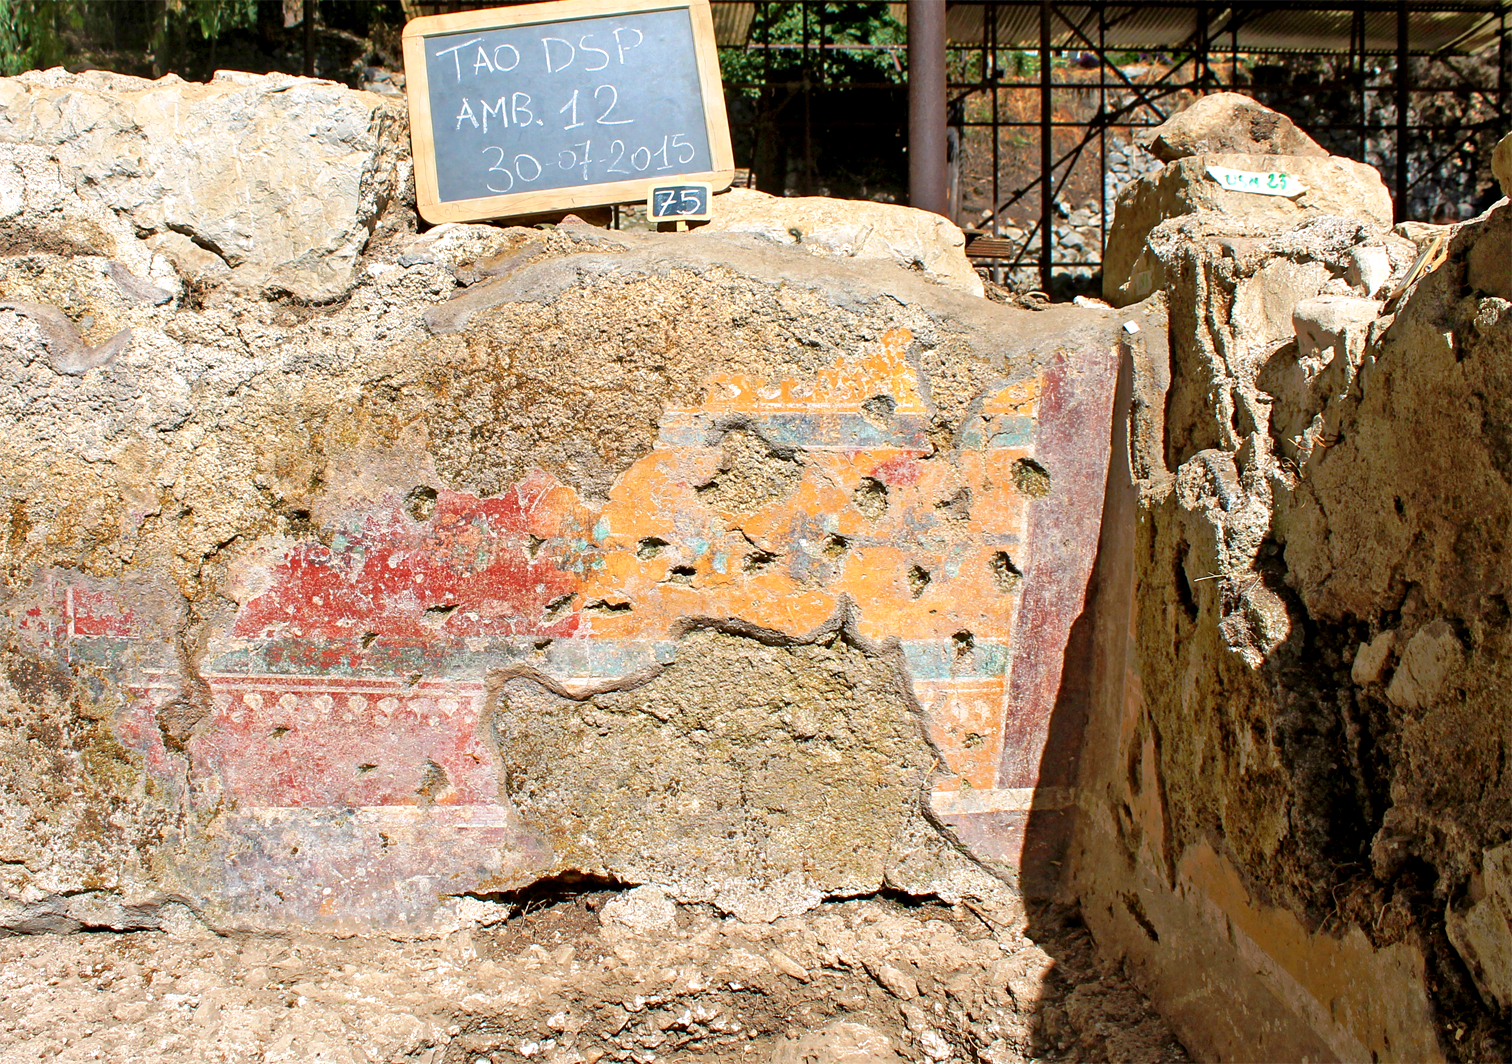

Supplement: s1 [file s1 › Figure S5.tif]

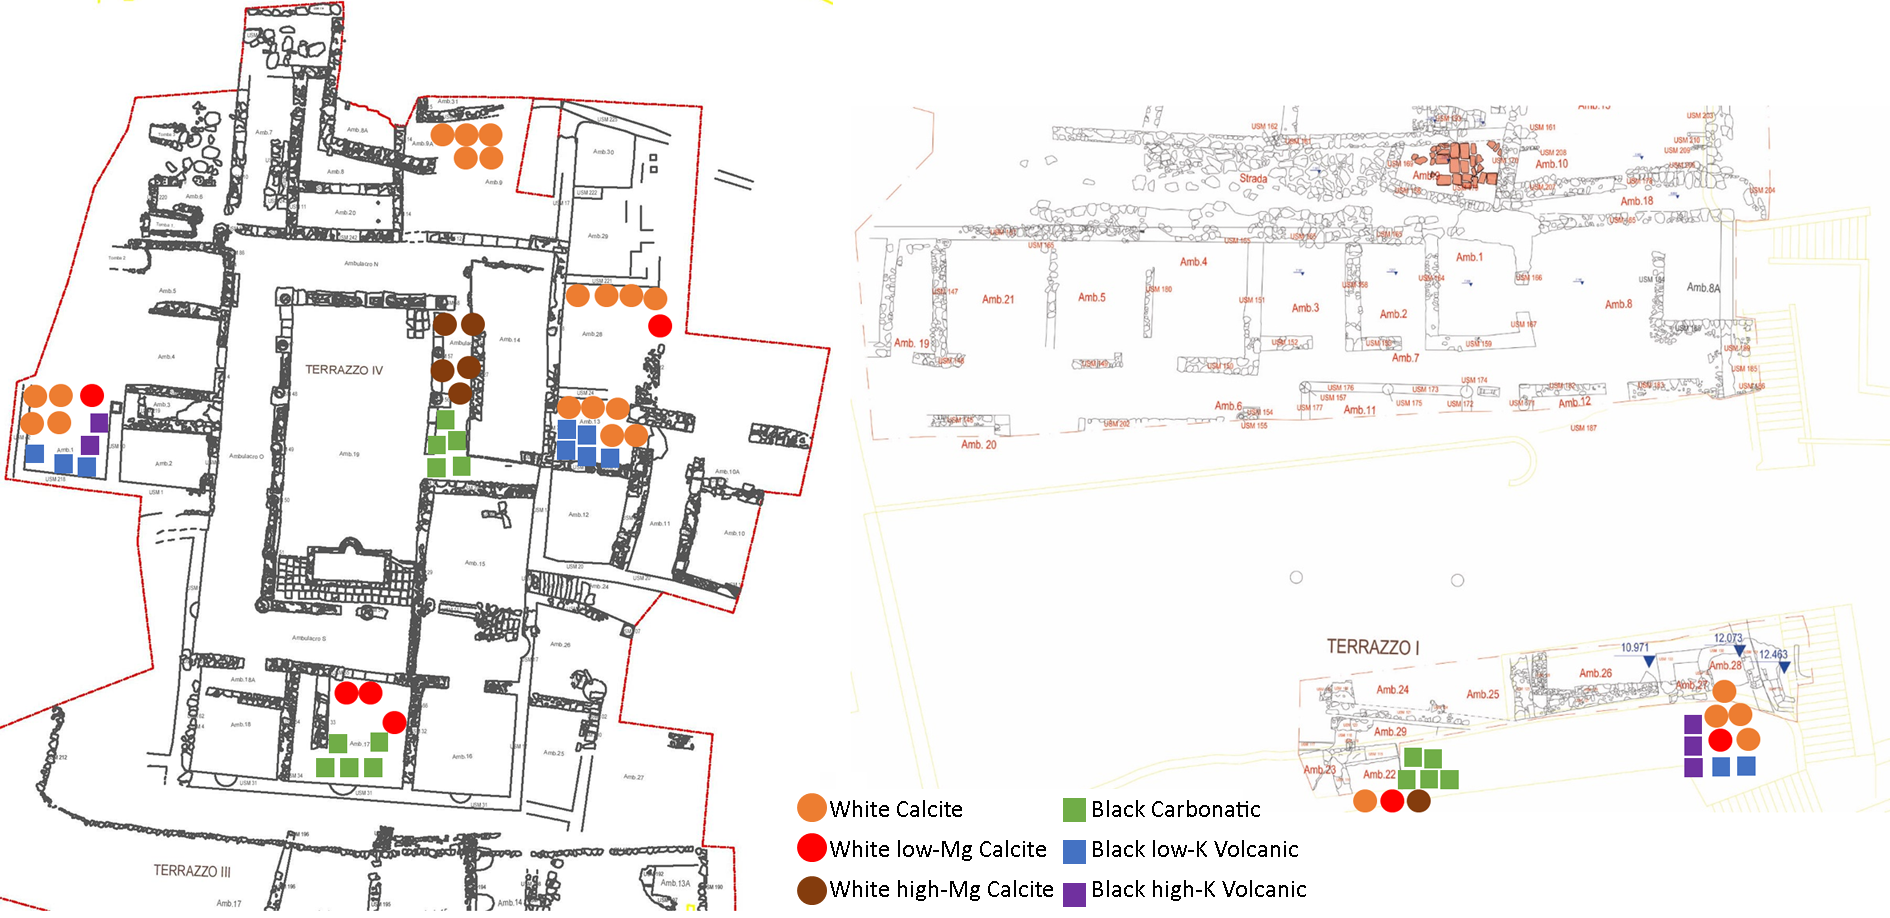

Supplement: s1 [file s1 › Figure S6.tif]
